# Supplementary material for: Heteroaryl sulfonamide synthesis: scope and limitations
Source: Royal Society of Chemistry journal article supplement (doi:10.1039/d2ob00345g), 2022-01-01

# Heteroaryl sulfonamide synthesis: Scope and limitations

Roman Iakovenko,<sup>a</sup> Daniel Chrenko,<sup>a,b</sup> Jozef Kristek,<sup>c</sup> Eline Desmedt,<sup>d</sup> František Zálešák,<sup>c</sup> Freija De Vleeschouwer<sup>d</sup> and Jiří Pospíšil<sup>\*a,b,c</sup>

*a. Laboratory of Growth Regulators, Institute of Experimental Botany of the Czech Academy of Sciences, and Faculty of Science, Palacky University, Šlechtitelů 27, Olomouc CZ-78371, Czech Republic.*

*b. Department of Chemical Biology, Faculty of Science, Palacky University, Šlechtitelů 27, Olomouc CZ-78371, Czech Republic.*

*c. Department of Organic Chemistry, Faculty of Science, Palacky University, tř. 17. listopadu 1192/12, Olomouc CZ-771 46, Czech Republic.*

*d. Eenheid Algemene Chemie (ALGC), Vrije Universiteit Brussel (VUB) Pleinlaan 2, 1050 Brussels, Belgium.*

*E-mail: j.pospisil@upol.cz*

**Abstract:** Heteroaryl sulfonamides are important structural motifs in the medicinal and agrochemical industries. However, their synthesis often relies on the use of heteroaryl sulfonyl chlorides, which are unstable and toxic reagents. Herein, we report a protocol that allows direct oxidative coupling of heteroaryl thiols and primary amines, readily available and inexpensive commodity chemicals. The transformation proceeds under mild reaction conditions and yields the desired *N*-alkylated sulfonamides in good yields. *N*-alkyl heteroaryl sulfonamides can be further transformed using a microwave-promoted Fukuyama-Mitsunobu reaction to *N,N*-dialkyl heteroaryl sulfonamides. The developed protocols thus enable the preparation of previously difficult to prepare sulfonamides (toxic reagents, harsh conditions, and low yields) under mild conditions.

## Table of Contents

|                                                                                                                                                                                               |     |
|-----------------------------------------------------------------------------------------------------------------------------------------------------------------------------------------------|-----|
| Copy of chromatograms from chiral separations.....                                                                                                                                            | S3  |
| Methyl N-benzyl-N-(pyridin-2-ylsulfonyl)-D-alaninate ((+)- <b>17a</b> ) & methyl N-benzyl-N-(pyridin-2-ylsulfonyl)-L-alaninate ((-)- <b>17a</b> ) .....                                       | S3  |
| Ethyl N-benzyl-N-(pyrimidin-2-ylsulfonyl)-L-alaninate ((-)- <b>17b</b> ).....                                                                                                                 | S4  |
| Methyl N-benzyl-N-((1-methyl-1H-benzimidazol-2-yl)sulfonyl)-D-alaninate ((+)- <b>17c</b> ) & methyl N-benzyl-N-((1-methyl-1H-benzimidazol-2-yl)sulfonyl)-L-alaninate ((-)- <b>17c</b> ) ..... | S5  |
| Methyl N-benzyl-N-((1-methyl-1H-imidazol-2-yl)sulfonyl)-D-alaninate (+)- <b>17d</b> & methyl N-benzyl-N-((1-methyl-1H-imidazol-2-yl)sulfonyl)-L-alaninate (-)- <b>17d</b> .....               | S6  |
| Methyl N-benzyl-N-(benzoxazol-2-ylsulfonyl)-D-alaninate (+)- <b>17e</b> .....                                                                                                                 | S7  |
| Methyl N-benzyl-N-(benzoxazol-2-ylsulfonyl)-D-alaninate (+)- <b>17f</b> .....                                                                                                                 | S8  |
| Methyl N-benzyl-N-(oxazol-2-ylsulfonyl)-D-alaninate (+)- <b>17g</b> & methyl N-benzyl-N-(oxazol-2-ylsulfonyl)-L-alaninate (-)- <b>17g</b> .....                                               | S9  |
| Ethyl N-(benzo[d]thiazol-2-ylsulfonyl)-N-benzyl-L-alaninate (-)- <b>17h</b> .....                                                                                                             | S11 |
| Methyl N-(benzo[d]thiazol-2-ylsulfonyl)-N-benzyl-L-alaninate (-)- <b>17i</b> & methyl N-(benzo[d]thiazol-2-ylsulfonyl)-N-benzyl-D-alaninate (+)- <b>17i</b> .....                             | S12 |
| Methyl N-benzyl-N-(thiazol-2-ylsulfonyl)-D-alaninate (+)- <b>17j</b> & methyl N-benzyl-N-(thiazol-2-ylsulfonyl)-L-alaninate (-)- <b>17j</b> .....                                             | S13 |
| (S)-N-benzyl-N-(octan-2-yl)benzo[d]thiazole-2-sulfonamide ((-)- <b>17k</b> ).....                                                                                                             | S14 |

# Copy of chromatograms from chiral separations

Methyl *N*-benzyl-*N*-(pyridin-2-ylsulfonyl)-*D*-alaninate ((+)-**17a**) & methyl *N*-benzyl-*N*-(pyridin-2-ylsulfonyl)-*L*-alaninate ((-)-**17a**)

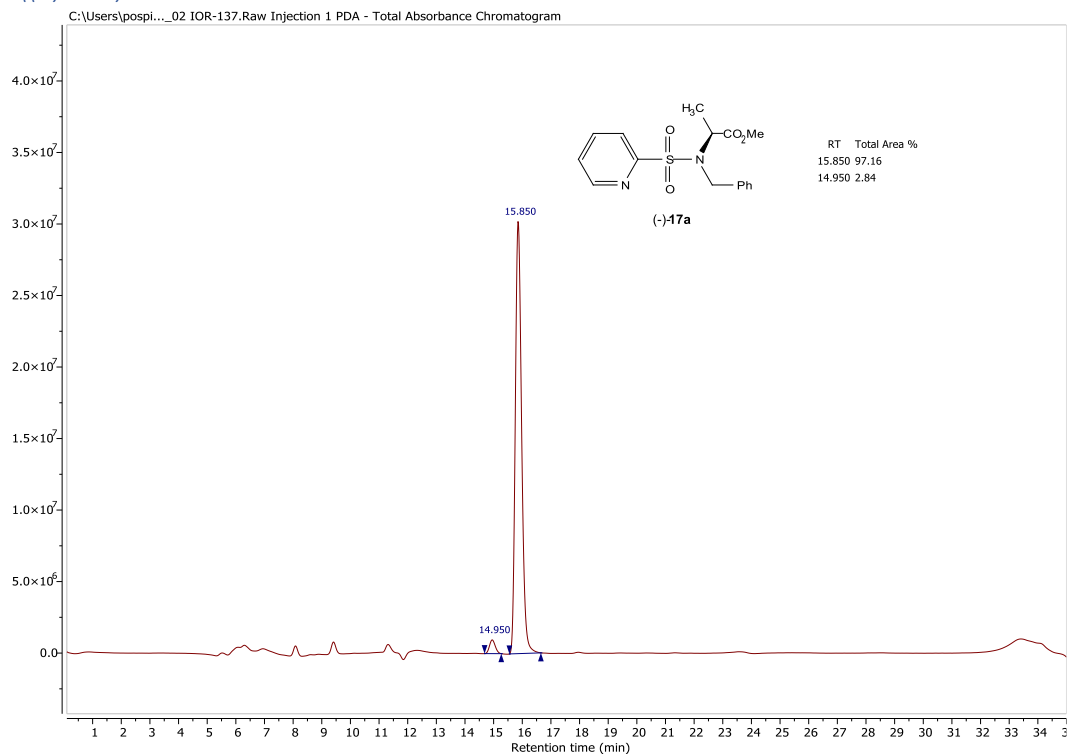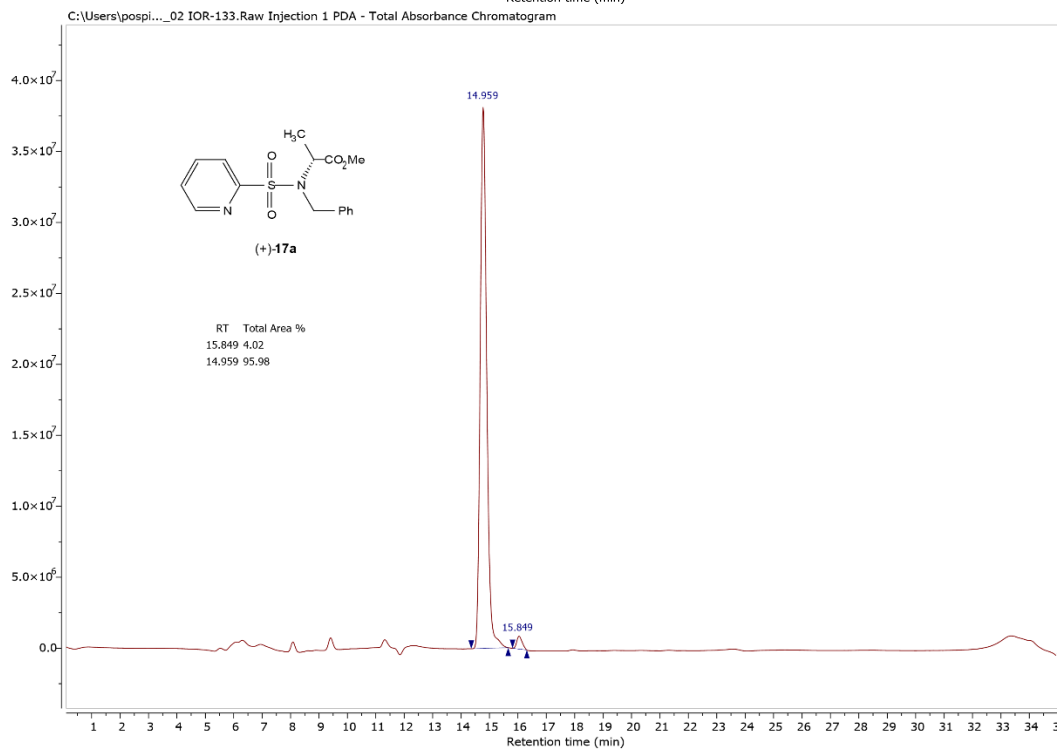

*Ethyl N-benzyl-N-(pyrimidin-2-ylsulfonyl)-L-alaninate ((-)-17b)*

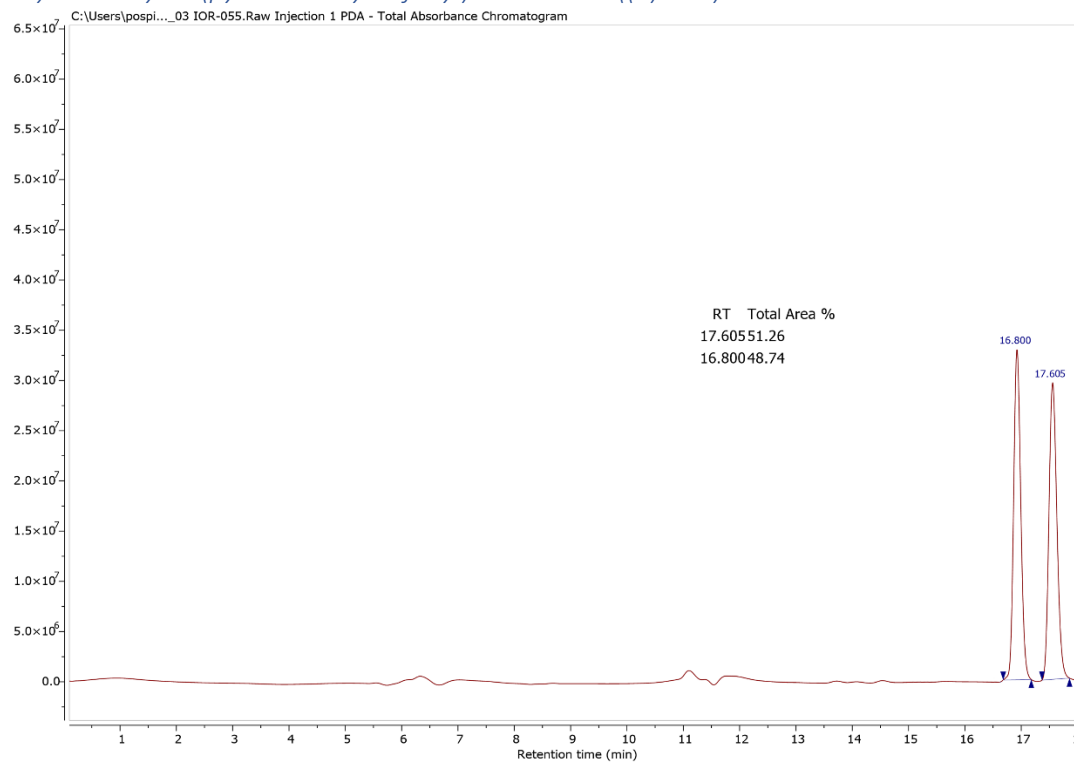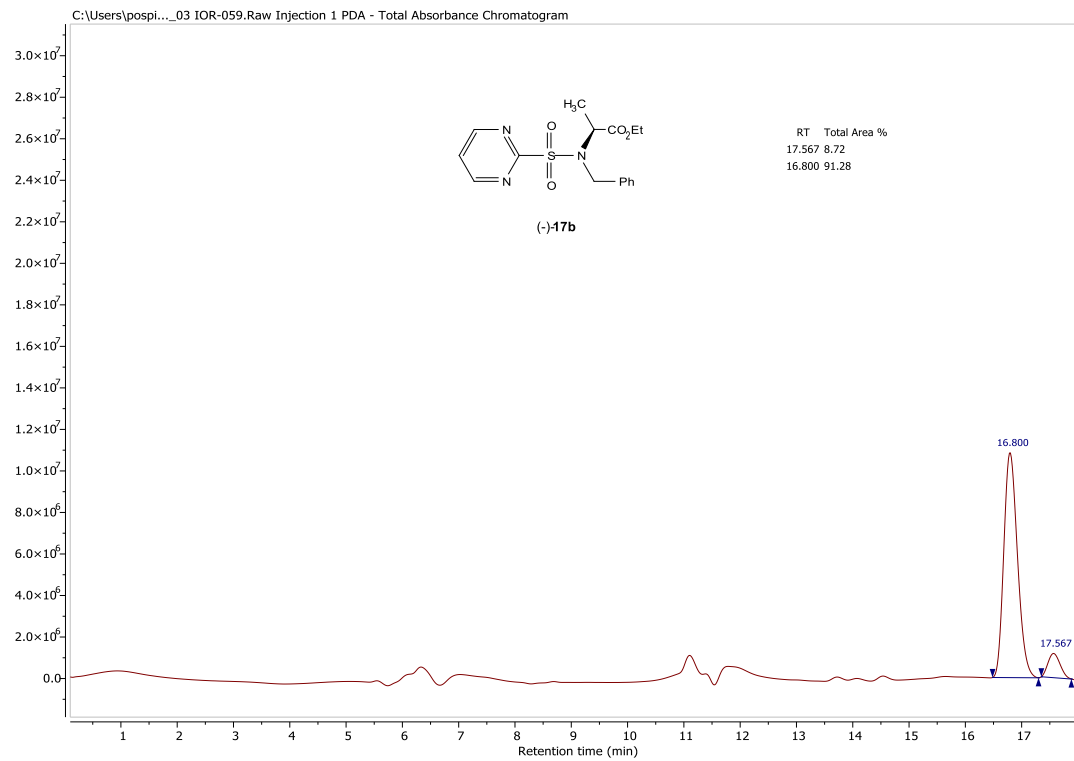

Methyl N-benzyl-N-((1-methyl-1H-benzimidazol-2-yl)sulfonyl)-D-alaninate ((+)-**17c**) & methyl N-benzyl-N-((1-methyl-1H-benzimidazol-2-yl)sulfonyl)-L-alaninate ((-)-**17c**)

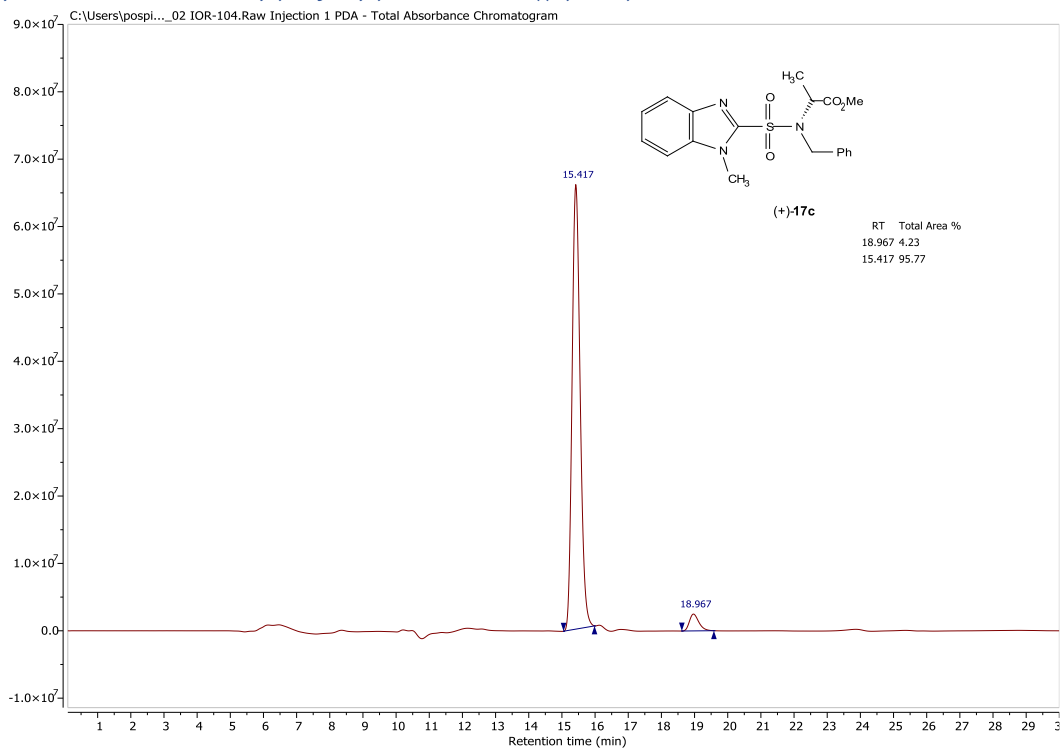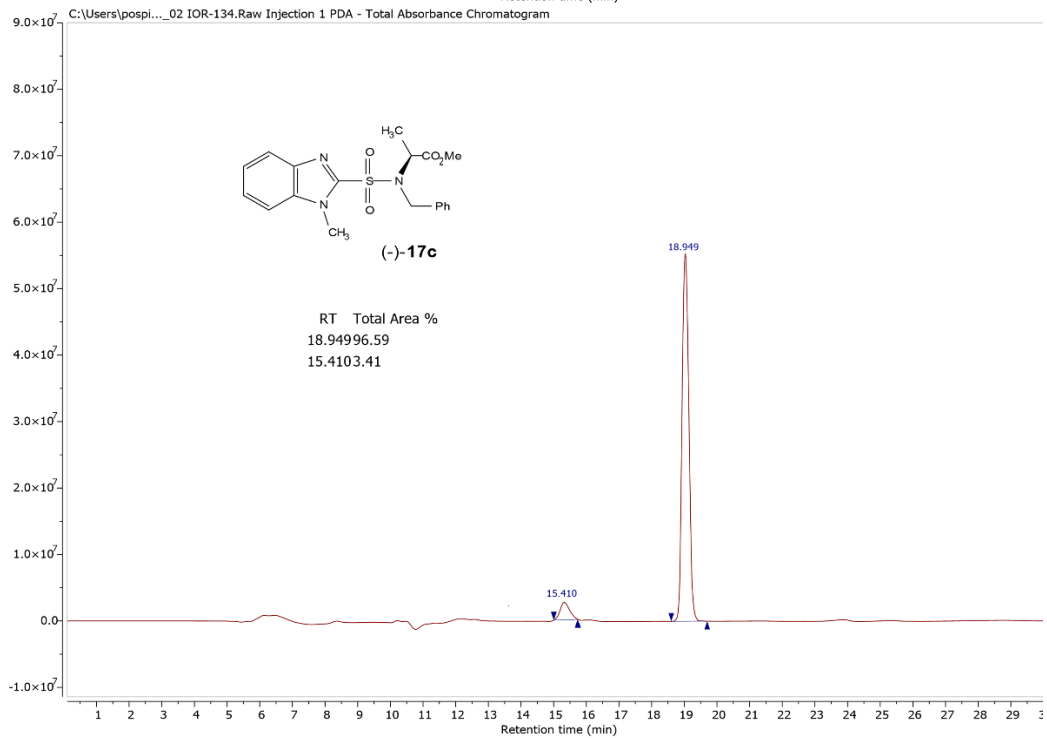

Methyl N-benzyl-N-((1-methyl-1H-imidazol-2-yl)sulfonyl)-D-alaninate (+)-**17d** & methyl N-benzyl-N-((1-methyl-1H-imidazol-2-yl)sulfonyl)-L-alaninate (-)-**17d**

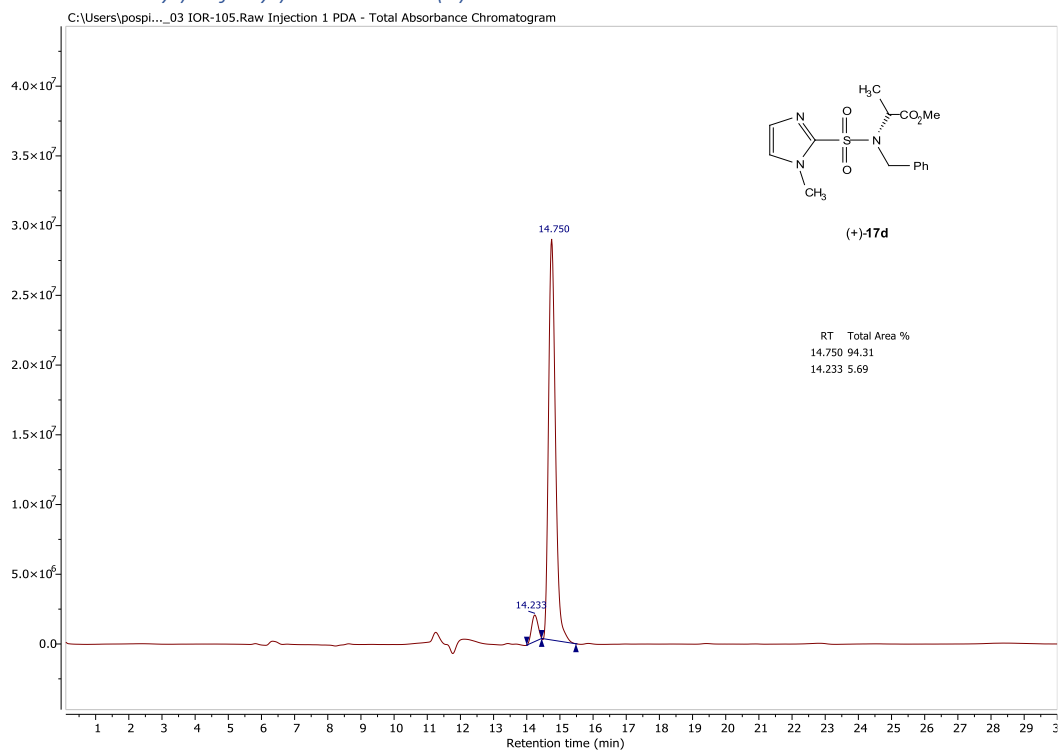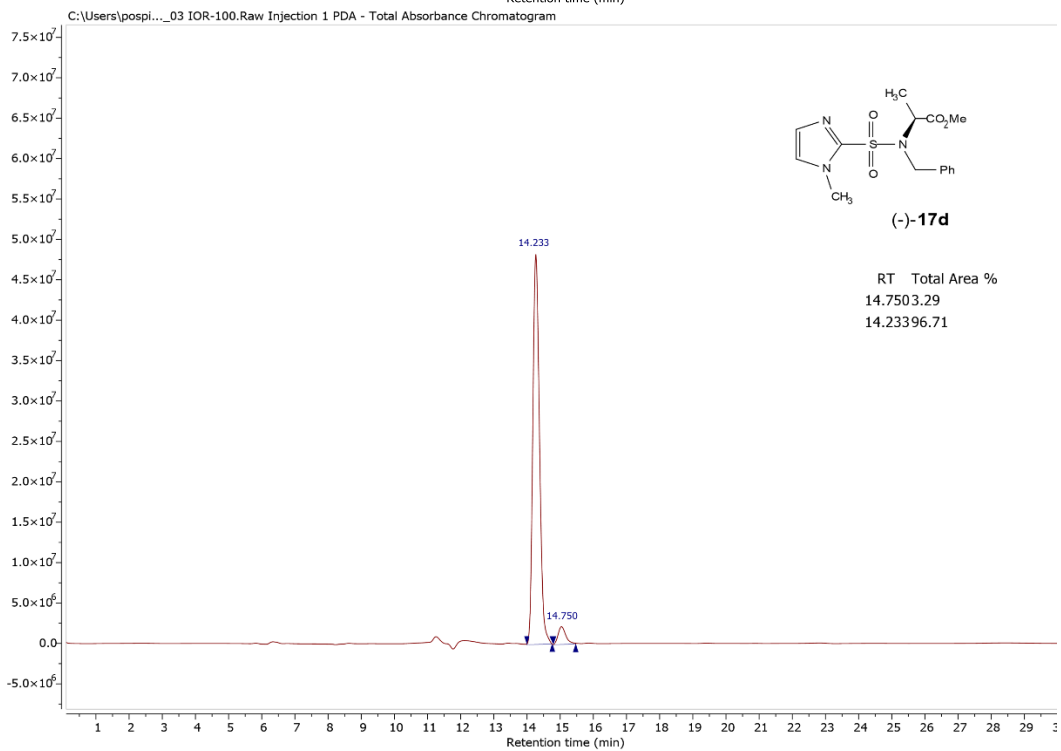

Methyl N-benzyl-N-(benzoxazol-2-ylsulfonyl)-D-alaninate (+)-17e

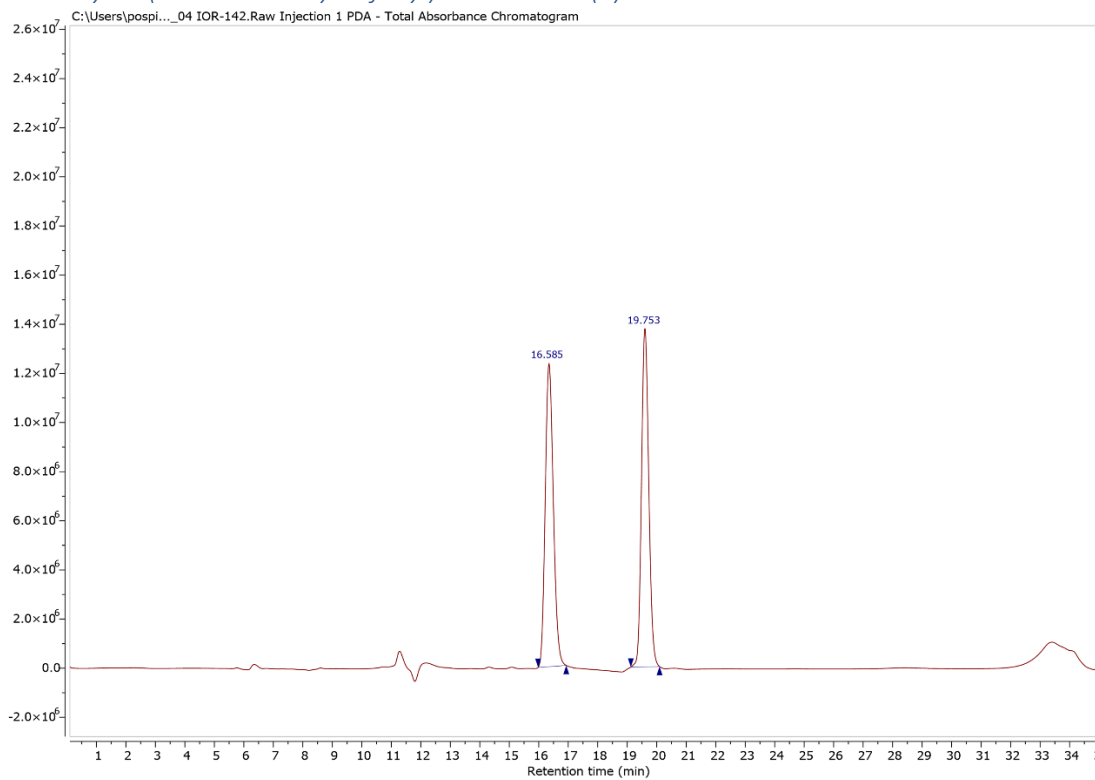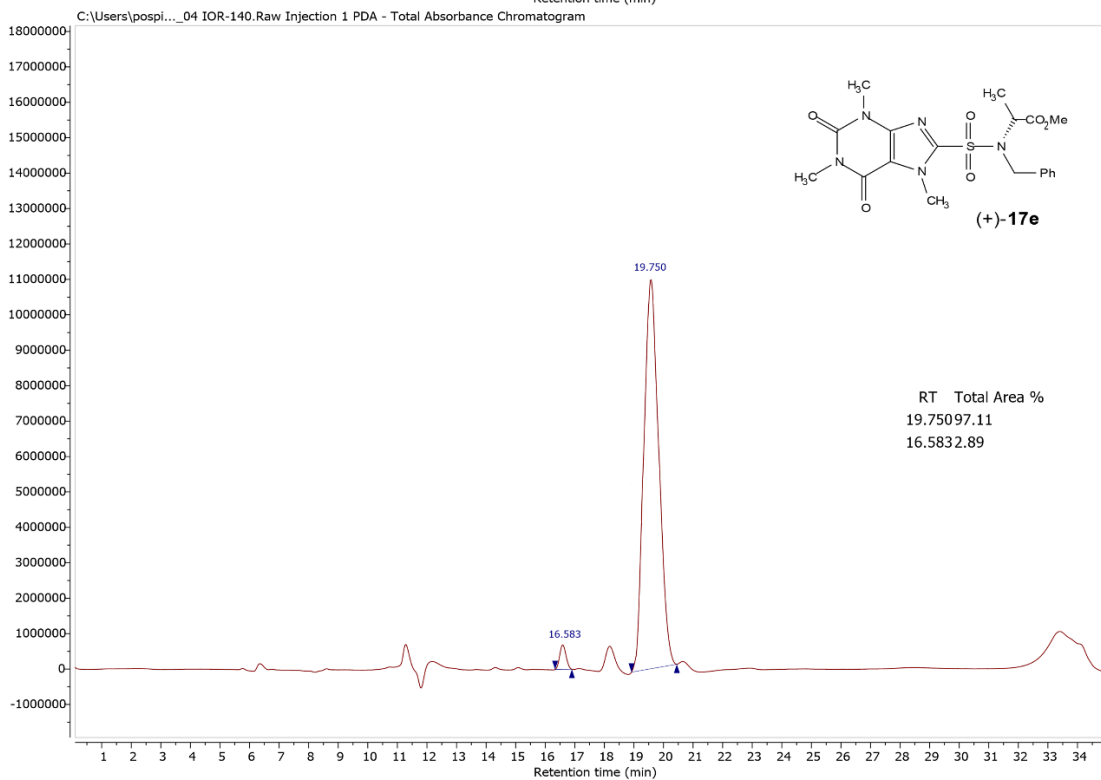

Methyl N-benzyl-N-(benzoxazol-2-ylsulfonyl)-D-alaninate (+)-17f

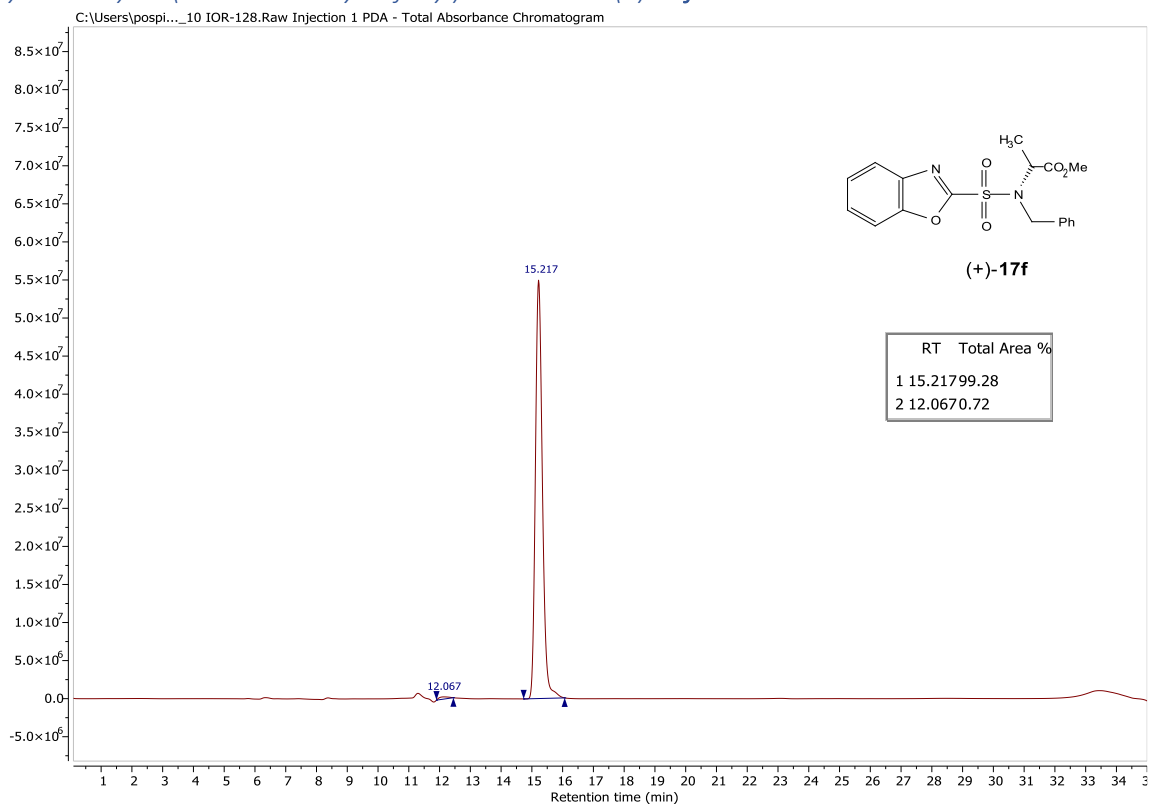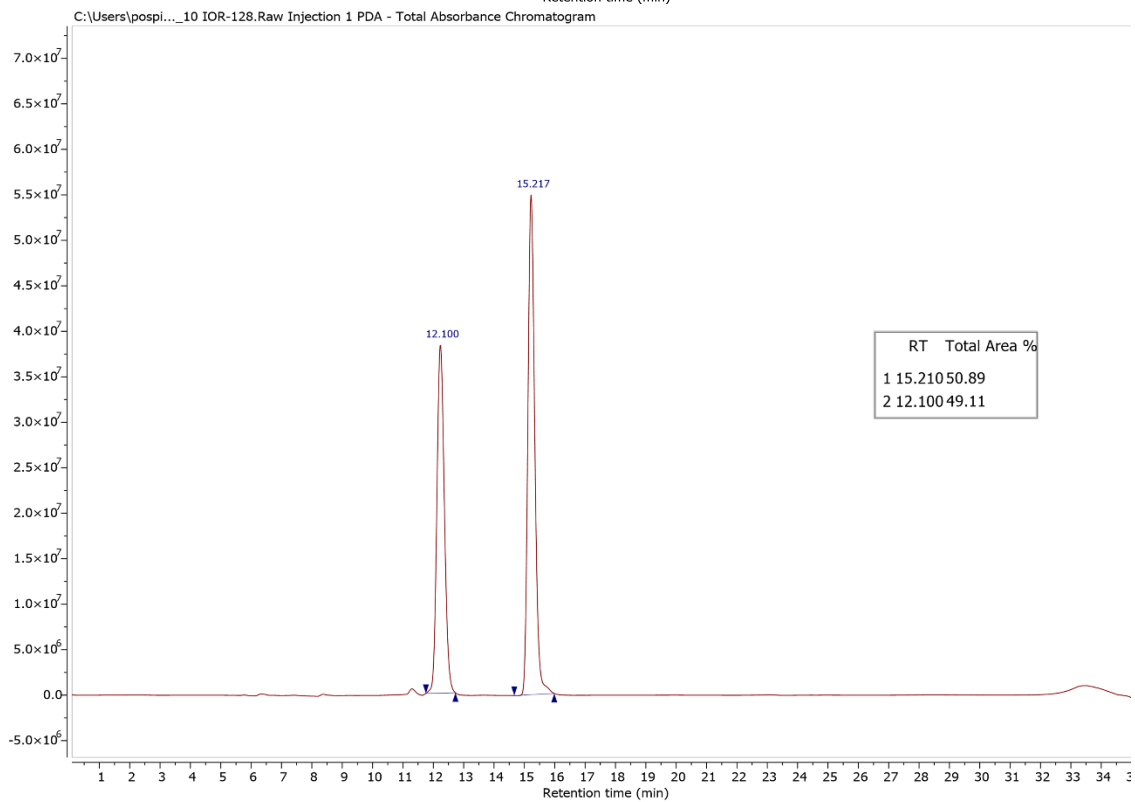



Methyl N-benzyl-N-(oxazol-2-ylsulfonyl)-D-alaninate (+)-17g & methyl N-benzyl-N-(oxazol-2-ylsulfonyl)-L-alaninate (-)-17g

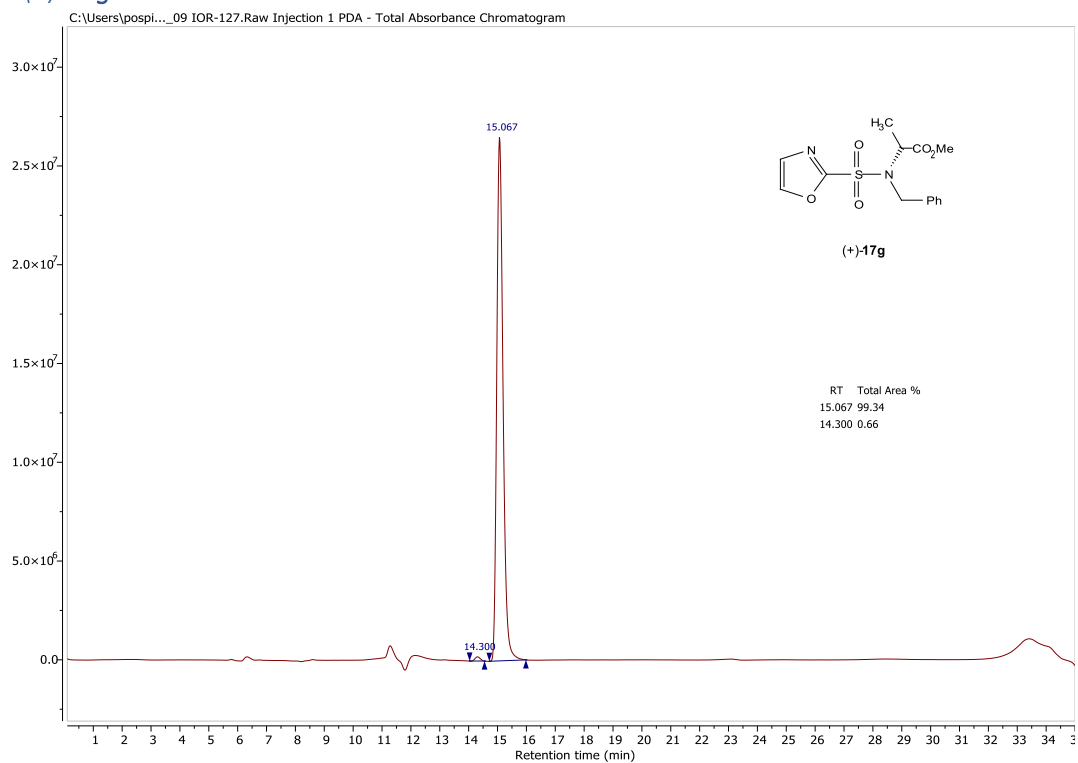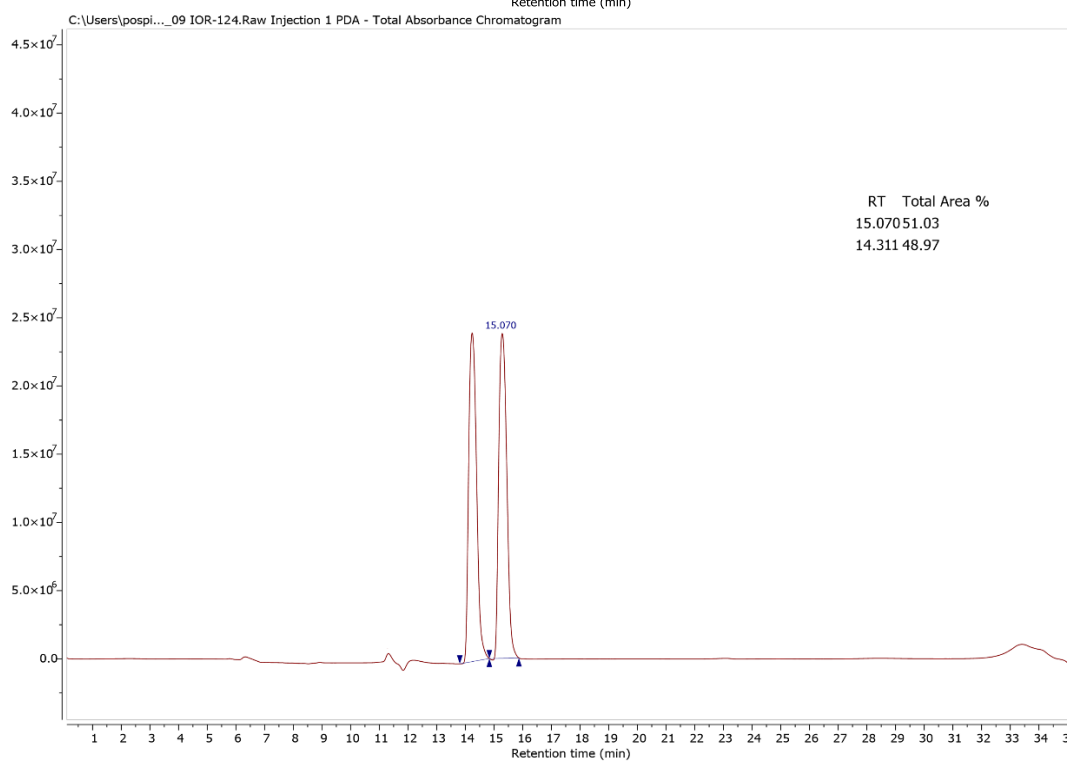

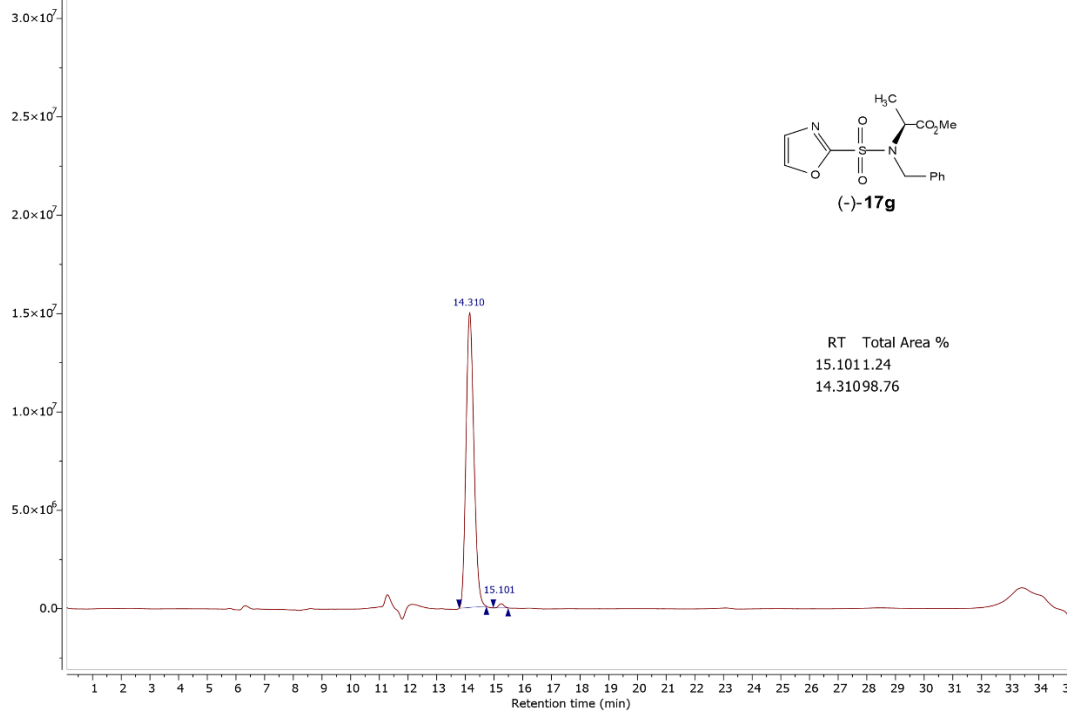

Ethyl N-(benzo[d]thiazol-2-ylsulfonyl)-N-benzyl-L-alaninate (-)-17h

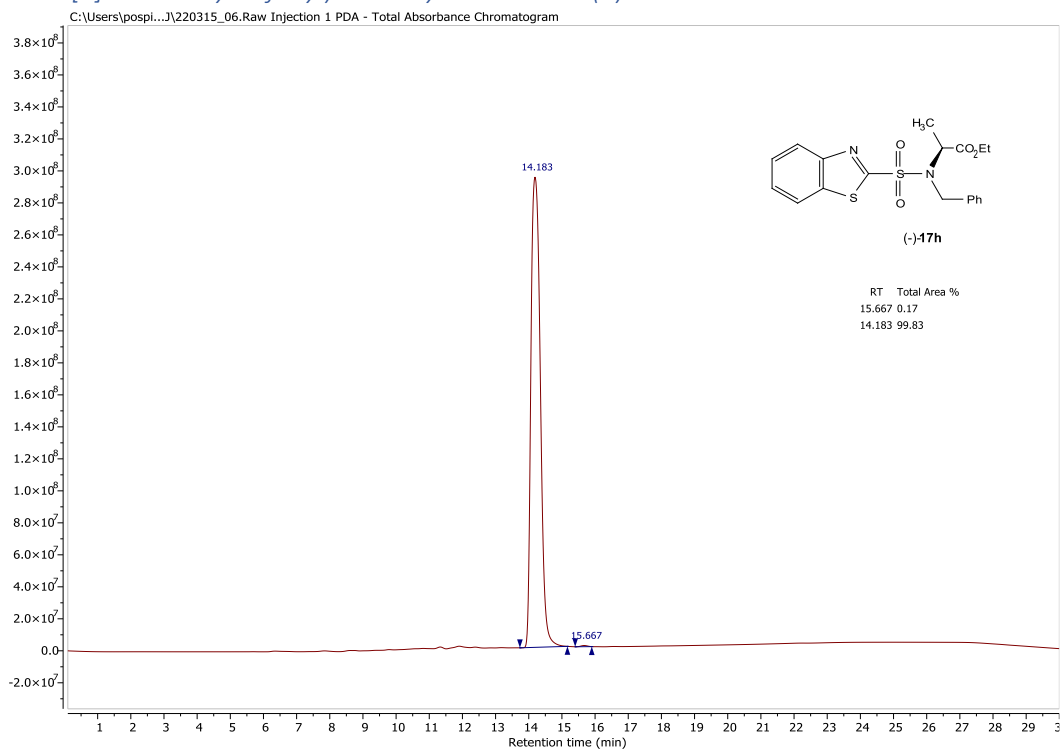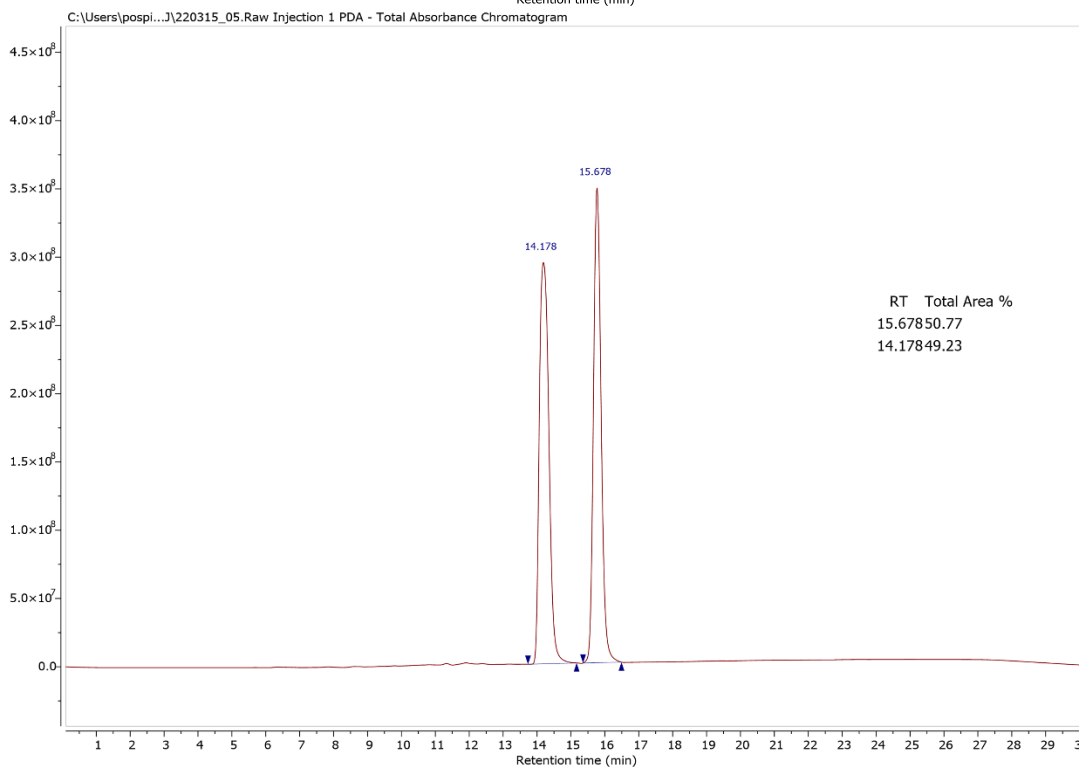

Methyl N-(benzo[d]thiazol-2-ylsulfonyl)-N-benzyl-L-alaninate (-)-17i & methyl N-(benzo[d]thiazol-2-ylsulfonyl)-N-benzyl-D-alaninate (+)-17i

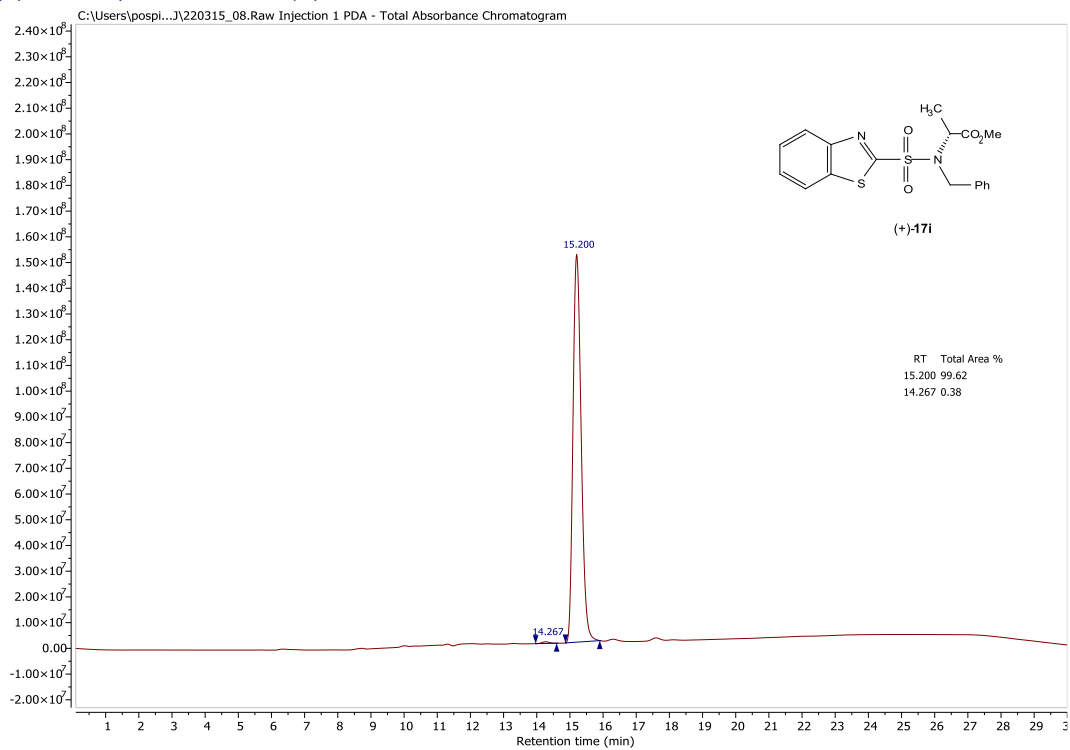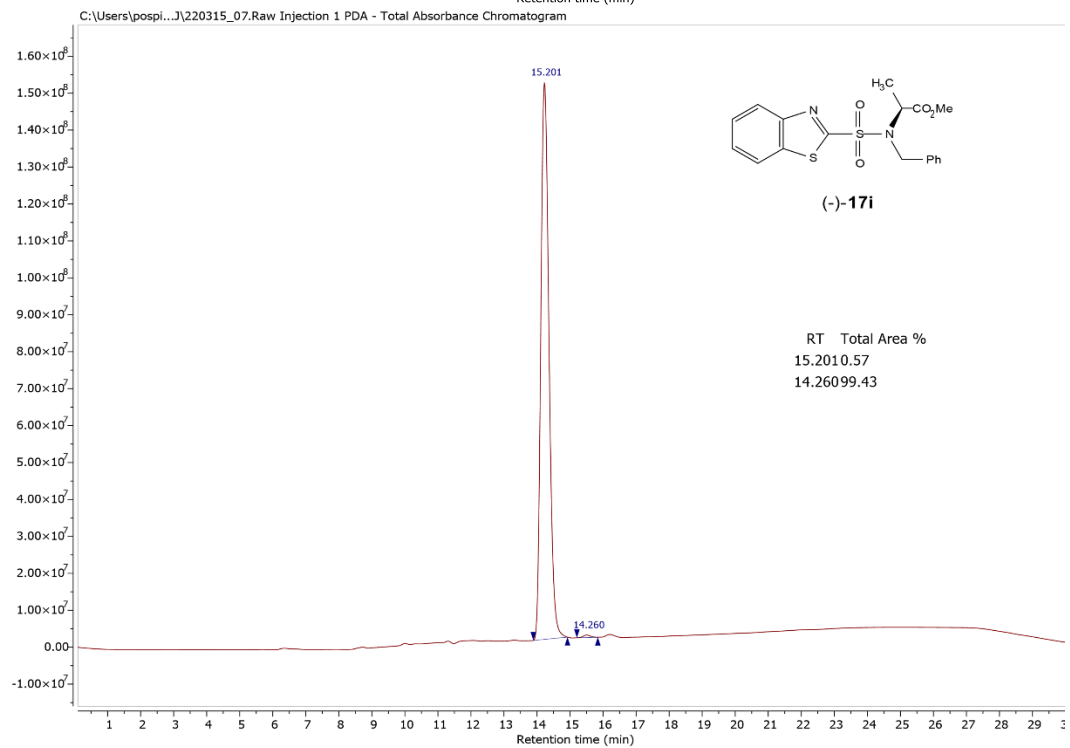

Methyl N-benzyl-N-(thiazol-2-ylsulfonyl)-D-alaninate (+)-**17j** & methyl N-benzyl-N-(thiazol-2-ylsulfonyl)-L-alaninate (-)-**17j**

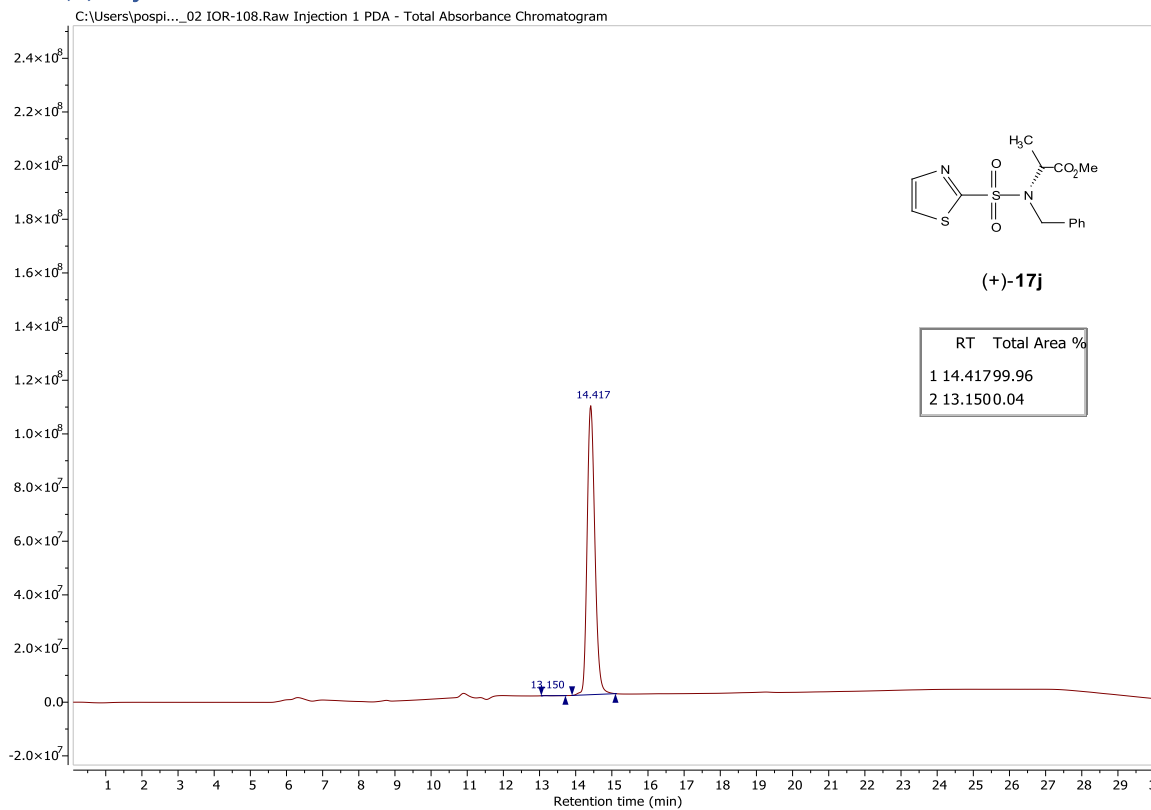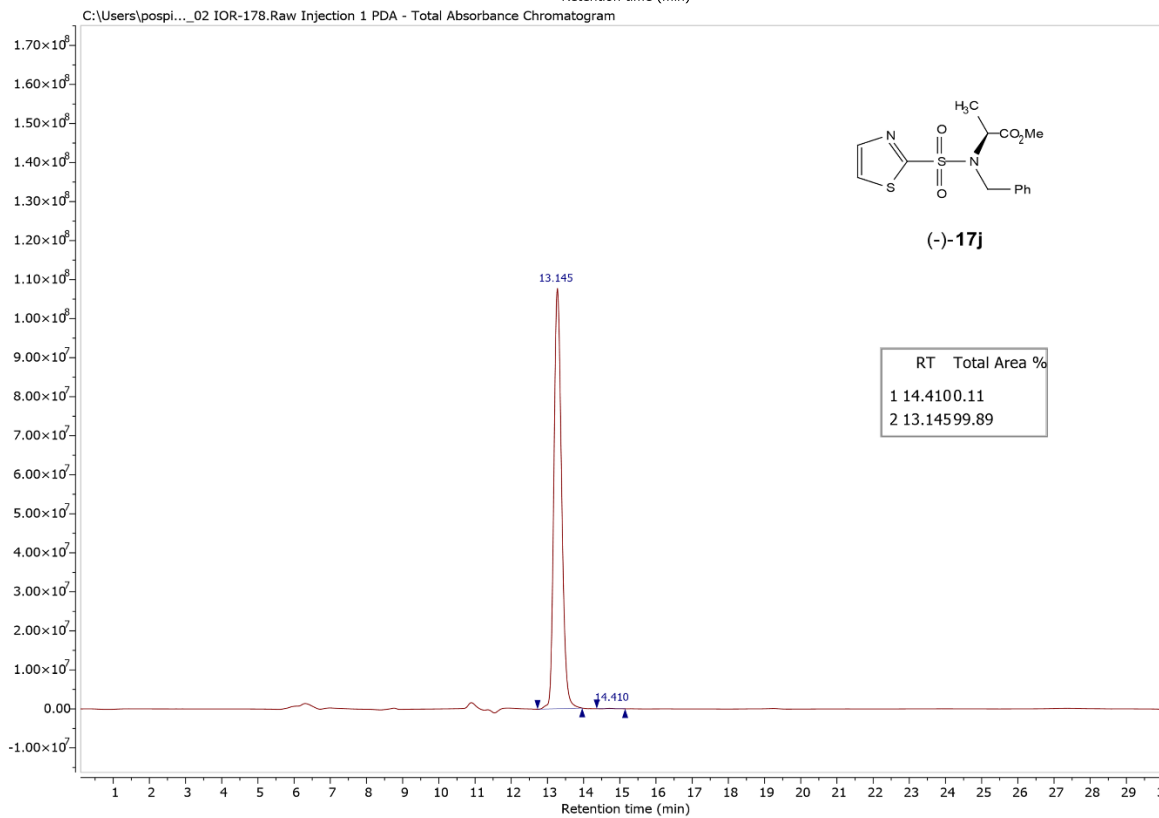

*(S)*-*N*-benzyl-*N*-(octan-2-yl)benzo[d]thiazole-2-sulfonamide ((-)-17k)

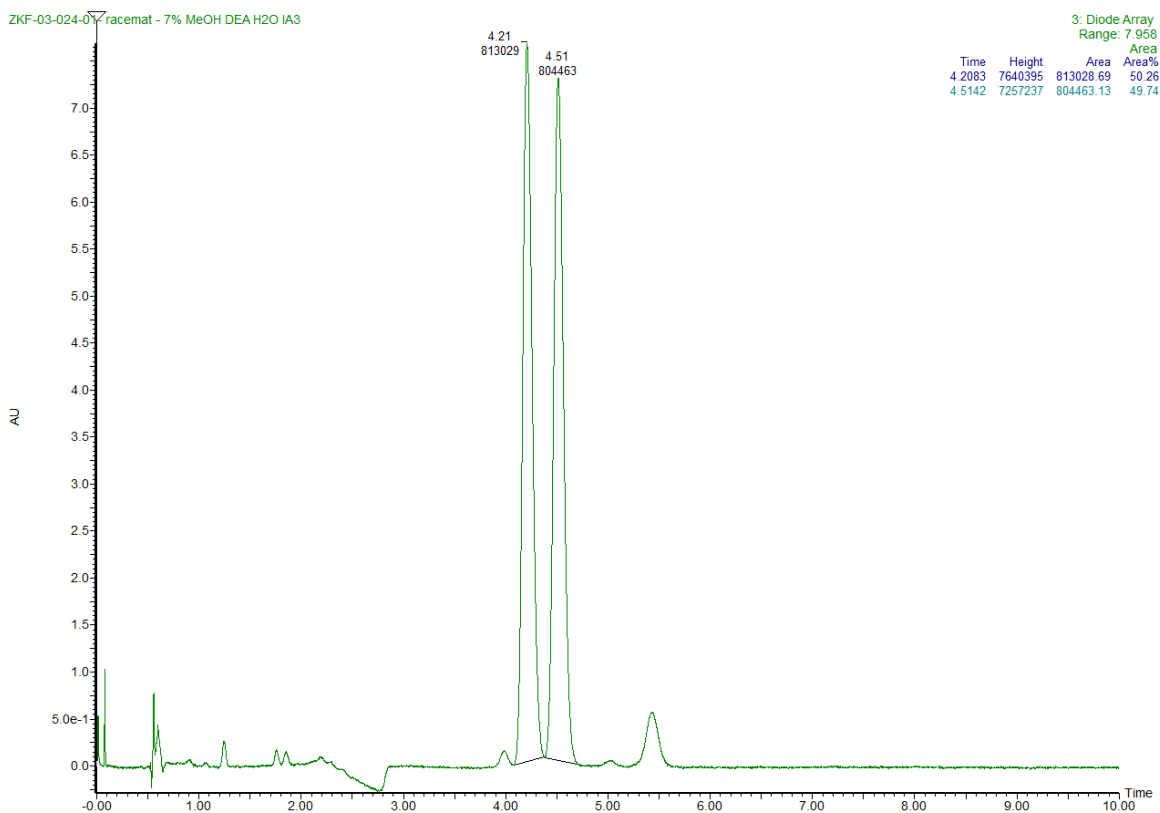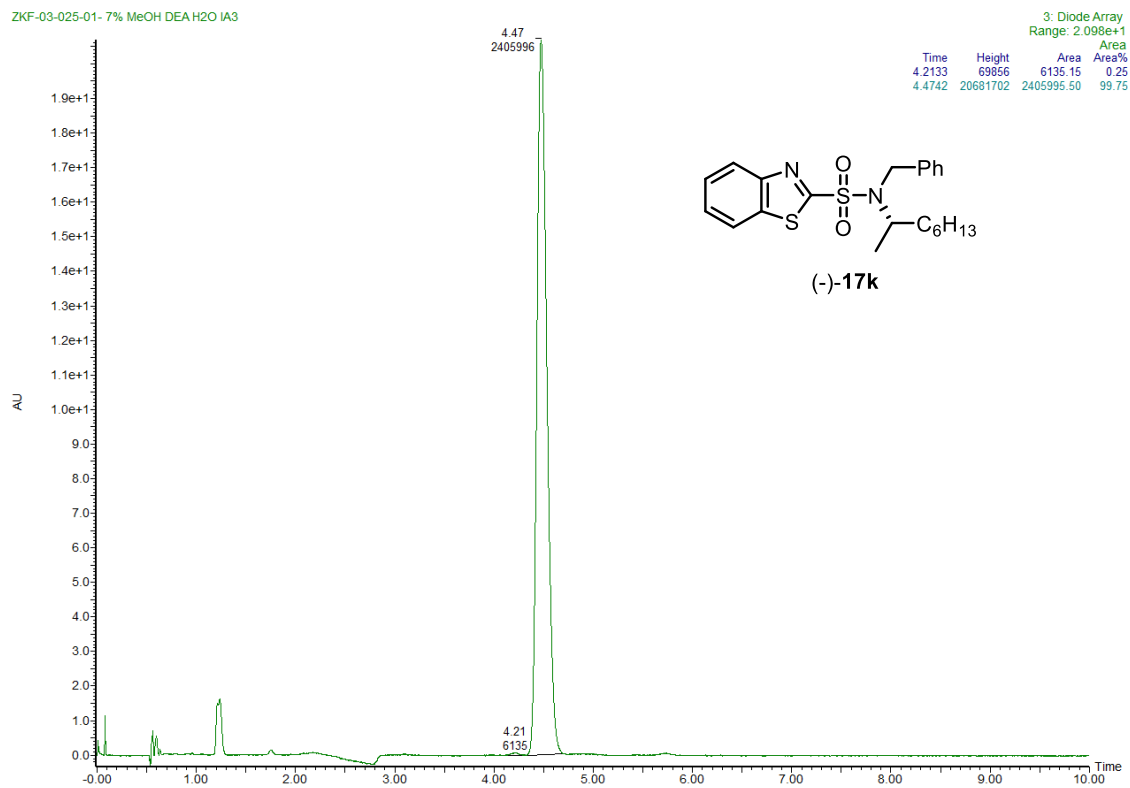

Supplement: d2ob00345g3.pdf [file d2ob00345g3.pdf]
